# Supplementary material for: Comparing Quality of Life in Breast Cancer Patients Who Underwent Mastectomy Versus Breast-Conserving Surgery: A Meta-Analysis
Source: MDPI journal article supplement (doi:10.3390/ijerph16244970), 2019-12-06
Supplement: s1 [file s1]

# Supplementary file

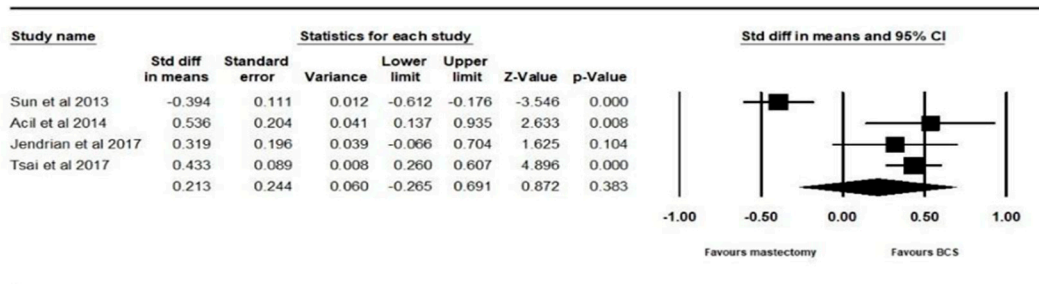

**Figure S1.** Forest plot showing the standardised mean difference of the sexual enjoyment score in patients who underwent mastectomy vs BCS (SMD = 0.213; 95% CI -0.265–0.691;  $p = 0.383$ ).

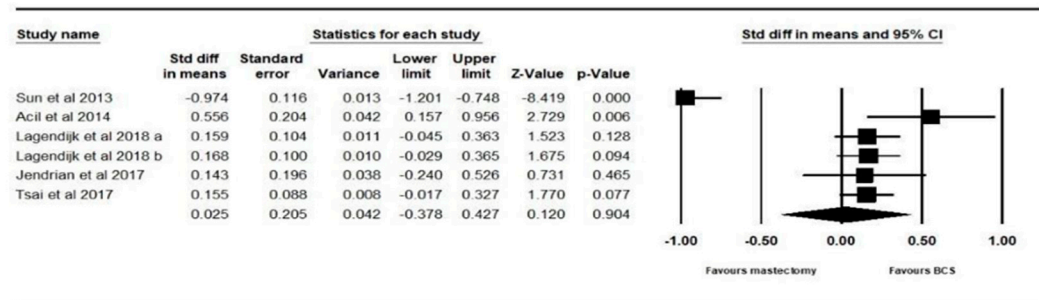

**Figure S2.** Forest plot showing the standardised mean difference of the sexual functioning score in patients who underwent mastectomy vs BCS (SMD = 0.025; 95% CI -0.378–0.427;  $p = 0.904$ ).

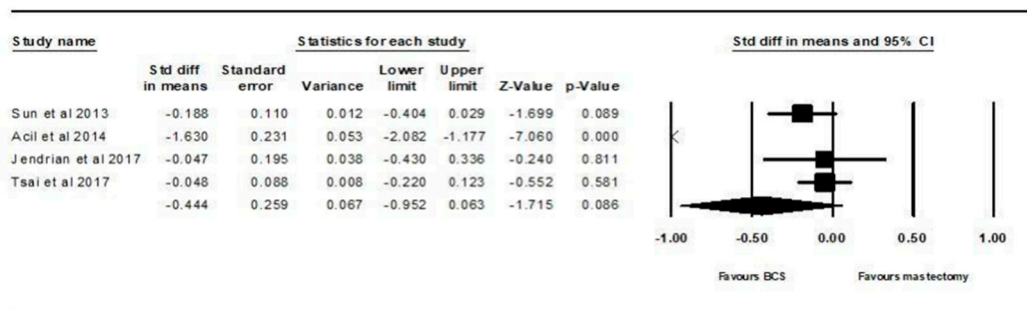

**Figure S3.** Forest plot showing the standardised mean difference of the upset with hair loss score in patients who underwent mastectomy vs BCS (SMD = -0.444; 95% CI -0.952–0.063;  $p = 0.086$ ).

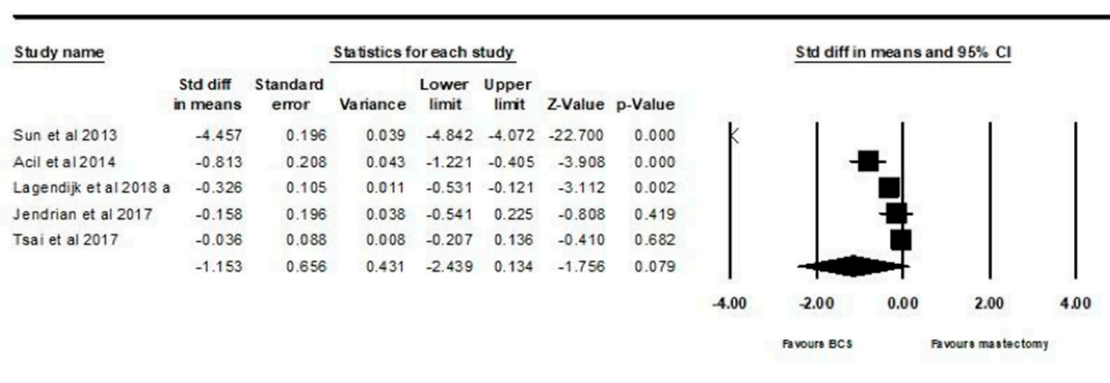

**Figure S4.** Forest plot showing the standardised mean difference of the arm symptoms score in patients who underwent mastectomy vs BCS (SMD = -1.153; 95% CI -2.439–0.134;  $p = 0.079$ ).

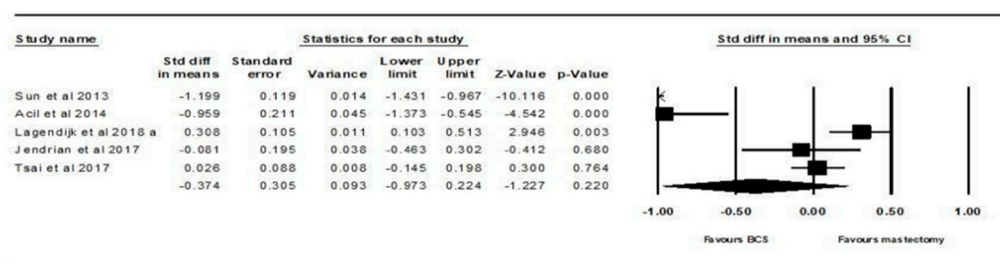

**Figure S5.** Forest plot showing the standardised mean difference of the breast symptoms score in patients who underwent mastectomy vs BCS (SMD = -0.374; 95% CI -0.973–0.224;  $p = 0.220$ ).
